# Supplementary material for: Teaching via ITV: Instructional Design--PLUS!.
Source: PLOS journal article supplement (doi:10.1371/journal.pone.0049696), 1998-04-01
Supplement: S1 (10.1371/journal.pone.0049696.s001) [file journal.pone.0049696.s001]

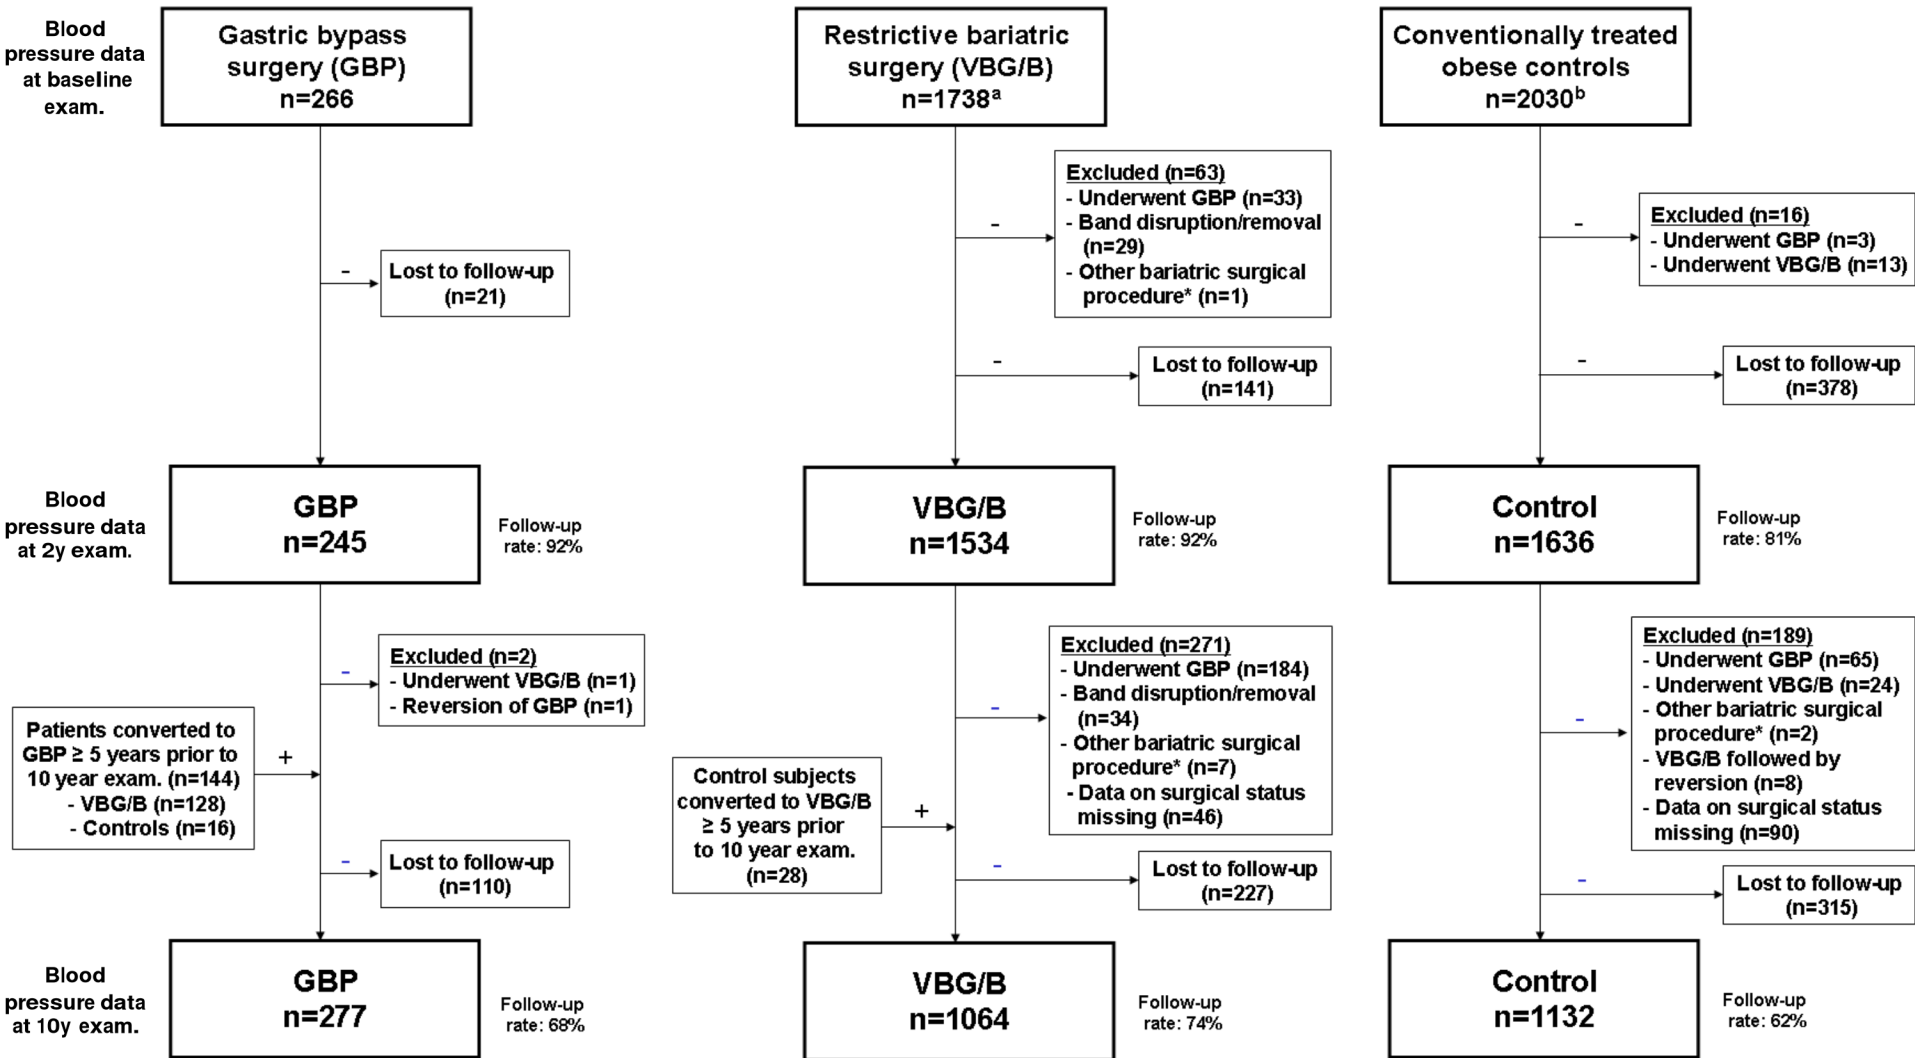

<sup>a</sup>Data on diastolic blood pressure were missing for 6 patients (0.3% of VBG/B subjects) in the Swedish obese subjects (SOS) study.

<sup>b</sup>Data on diastolic blood pressure were missing for 7 patients (0.3% of control patients) in the SOS study.

\*Other bariatric surgical procedures included gastric sleeve, duodenal switch and jejunio-intestinal bypass.
