# Supplementary material for: Teaching via ITV: Instructional Design--PLUS!.
Source: PLOS journal article supplement (doi:10.1371/journal.pone.0049696), 1998-04-01
Supplement: S3 (10.1371/journal.pone.0049696.s003) [file journal.pone.0049696.s003]

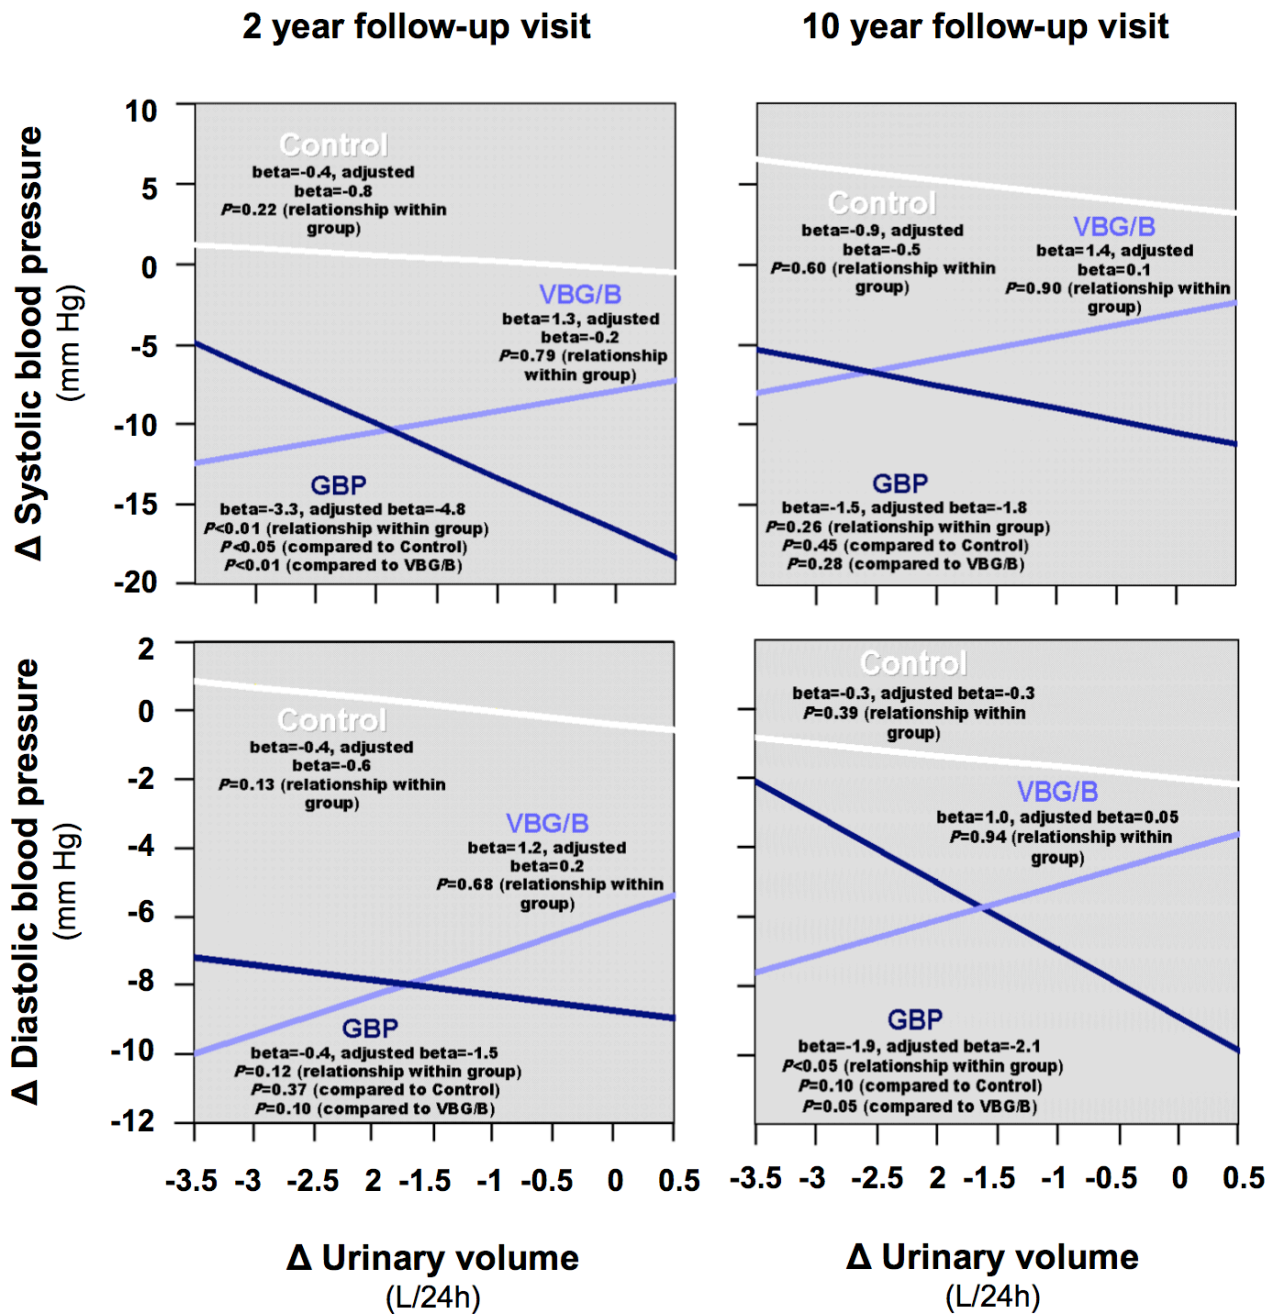

Figure S3
