# Supplementary material for: Teaching via ITV: Instructional Design--PLUS!.
Source: PLOS journal article supplement (doi:10.1371/journal.pone.0049696), 1998-04-01
Supplement: S5 (10.1371/journal.pone.0049696.s005) [file journal.pone.0049696.s005]

## Supporting information table S2:

**Changes from baseline after vertical banded gastroplasty (VBG) and gastric banding at 2 and 10 years (multiple linear regression analyses).**

|                                              | Changes ( $\Delta$ ) at 2 year follow-up visit |                               |       | Changes ( $\Delta$ ) at 10 year follow-up visit |                               |      |
|----------------------------------------------|------------------------------------------------|-------------------------------|-------|-------------------------------------------------|-------------------------------|------|
|                                              | Adjusted change <sup>a</sup><br>mean           |                               | P     | Adjusted change <sup>a</sup><br>mean            |                               | P    |
|                                              | VBG<br>(n=1189)                                | Gastric<br>banding<br>(n=328) |       | VBG<br>(n=843)                                  | Gastric<br>banding<br>(n=202) |      |
| BMI (kg/m <sup>2</sup> )                     | -9.5                                           | -9.1                          | 0.14  | -6.5                                            | -6.1                          | 0.83 |
| Systolic pressure (mm Hg)                    | -7.4                                           | -9.3                          | 0.055 | -3.3                                            | -2.6                          | 0.54 |
| Diastolic pressure (mm Hg)                   | -5.7                                           | -6.9                          | 0.04  | -3.8                                            | -3.8                          | 0.37 |
| User of anti-hypertensives (%)               | 31                                             | 31                            | 0.99  | 45                                              | 40                            | 0.17 |
| User of diuretics (%)                        | 13                                             | 14                            | 0.53  | 19                                              | 19                            | 0.95 |
| Diurnal urinary volume (L)                   | -0.20                                          | -0.22                         | 0.51  | -0.15                                           | -0.12                         | 0.46 |
| Estimated daily salt intake <sup>#</sup> (g) | -2.6                                           | -2.2                          | 0.27  | -2.5                                            | -2.3                          | 0.54 |

<sup>a</sup> Difference between year 2 or 10 and baseline within each group after adjustment for change in body mass index (BMI), sex, age, baseline BMI and the baseline level of the respective variables. Urinary volume and salt intake are also adjusted for BMI change. Minus signs denote reductions.

<sup>#</sup> Estimated daily salt intake was calculated by multiplying urinary sodium values by 0.0585 (molecular weight of NaCl: 58.5).
