# Supplementary material for: Gastric Bypass Surgery Is Followed by Lowered Blood Pressure and Increased Diuresis - Long Term Results from the Swedish Obese Subjects (SOS) Study
Source: PLoS One. 2012 Nov 29;7(11):e49696. doi: 10.1371/journal.pone.0049696 (PMC3510228; doi:10.1371/journal.pone.0049696)
Supplement: Table S1 — Urinary and serum variables in users and non-users of diuretics among obese controls at the baseline examination. (PDF) [file pone.0049696.s004.pdf]

Supporting information table S1:

Urinary and serum variables in users and non-users of diuretics among obese controls at the baseline examination

|                                  | Users of<br>Diuretics (UD) | All control<br>subjects not<br>using<br>diuretics | Only controls<br>using other<br>types of BP<br>medications | Difference<br>comparing UD to all<br>controls not using<br>diuretics | Difference comparing<br>UD to controls using<br>other types of BP<br>medications |
|----------------------------------|----------------------------|---------------------------------------------------|------------------------------------------------------------|----------------------------------------------------------------------|----------------------------------------------------------------------------------|
|                                  | (n=239)                    | (n=1237)                                          | (n=285)                                                    |                                                                      |                                                                                  |
|                                  | mean (±SD)                 | mean (±SD)                                        | mean (±SD)                                                 | mean (95% CI)                                                        | mean (95% CI)                                                                    |
| <b>Urinary (24h)</b>             |                            |                                                   |                                                            |                                                                      |                                                                                  |
| Volume (L)                       | 2.07 (0.68)                | 1.90 (0.76)                                       | 1.92 (0.73)                                                | 0.18 (0.07 to 0.28)***                                               | 0.15 (0.03 to 0.27)*                                                             |
| Sodium (mmol)                    | 224 (96)                   | 204 (86)                                          | 221 (92)                                                   | 20 (6 to 33)**                                                       | 3 (-13 to 19)                                                                    |
| Estimated daily salt intake# (g) | 13.1 (5.6)                 | 11.9 (5.0)                                        | 12.9 (5.4)                                                 | 1.1 (0.4 to 1.9)**                                                   | 0.2 (-0.8 to 1.1)                                                                |
| Potassium (mmol)                 | 84 (30)                    | 83 (31)                                           | 87 (32)                                                    | 1 (-4 to 5)                                                          | -3 (-8 to 2)                                                                     |
| Sodium:Potassium                 | 2.8 (1.1)                  | 2.6 (1.0)                                         | 2.7 (1.1)                                                  | 0.2 (0.1 to 0.4)**                                                   | 0.1 (-0.1 to 0.3)                                                                |
| Creatinine (mmol)                | 13.6 (4.2)                 | 13.9 (4.2)                                        | 14.4 (4.3)                                                 | -0.4 (-0.9 to 0.2)                                                   | -0.9 (-1.6 to -0.1)*                                                             |
| <b>Serum</b>                     |                            |                                                   |                                                            |                                                                      |                                                                                  |
| Sodium (mmol/L)                  | 139.4 (2.8)                | 139.1 (2.7)                                       | 138.8 (2.6)                                                | 0.3 (-0.05 to 0.7) <sup>P=0.09</sup>                                 | 0.6 (0.1 to 1.1)*                                                                |
| Potassium (mmol/L)               | 4.04 (0.34)                | 4.18 (0.28)                                       | 4.16 (0.27)                                                | -0.14 (-0.19 to -0.09)***                                            | -0.12 (-0.18 to -0.07)***                                                        |
| Creatinine (µmol/L)              | 89.6 (15.3)                | 86.6 (11.3)                                       | 89.0 (12.4)                                                | 3.0 (1.0 to 5.1)**                                                   | 0.6 (-1.8 to 2.9)                                                                |
| <b>Blood pressure</b>            |                            |                                                   |                                                            |                                                                      |                                                                                  |
| Systolic pressure (mm Hg)        | 144 (18)                   | 137 (18)                                          | 146 (20)                                                   | 6.9 (4.4 to 9.5)***                                                  | -1.3 (-4.6 to 1.9)                                                               |
| Diastolic pressure (mm Hg)       | 87 (11)                    | 85 (11)                                           | 89 (11)                                                    | 2.5 (1.0 to 4.0)***                                                  | -1.4 (-3.2 to 0.4)                                                               |

A user of diuretics was defined as someone who, on a daily basis, took a medication included under the code: CO3 (diuretics) in the Anatomic Therapeutic Chemical (ATC) classification system.

# Estimated daily salt intake was calculated by multiplying urinary sodium values by 0.0585 (molecular weight of NaCl: 58.5). CI denotes confidence interval.

\*P<0.05 \*\*P<0.01 and \*\*\*P<0.001 comparing users and non-users of diuretics with Students t test
